# Supplementary material
Source: PubMed Central journal article supplement (PMC6541895)
Supplement: ci8b00466_si_001.pdf [file ci8b00466_si_001.pdf]

## Supporting Information

---

# Integrative Data Mining, Scaffold Analysis, and Sequential Binary Classification Models for Exploring Ligand Profiles of Hepatic Organic Anion Transporting Polypeptides (OATPs)

*Alžběta Türková,<sup>†</sup> Sankalp Jain,<sup>†</sup> Barbara Zdrzil<sup>\*†</sup>*

<sup>†</sup>University of Vienna, Department of Pharmaceutical Chemistry, Division of Drug Design and Medicinal Chemistry, Althanstraße 14, A-1090 Vienna, Austria.

\*Corresponding author: [barbara.zdrzil@univie.ac.at](mailto:barbara.zdrzil@univie.ac.at)

### Table of Contents

|                |     |
|----------------|-----|
| Table S1.....  | p3  |
| Table S2.....  | p7  |
| Table S3.....  | p10 |
| Table S4.....  | p10 |
| Table S5.....  | p11 |
| Table S6.....  | p12 |
| Table S7.....  | p13 |
| Table S8.....  | p14 |
| Table S9.....  | p15 |
| Table S10..... | p15 |
| Table S11..... | p16 |
| Table S12..... | p17 |
| Table S13..... | p20 |
| Table S14..... | p21 |
| Table S15..... | p22 |
| Table S16..... | p23 |
| Table S17..... | p24 |

|                                              |     |
|----------------------------------------------|-----|
| Figure S1.....                               | p25 |
| Figure S2.....                               | p26 |
| Figure S3.....                               | p27 |
| Figure S4.....                               | p28 |
| Figure S5.....                               | p30 |
| Figure S6.....                               | p31 |
| Figure S7.....                               | p32 |
| Figure S8.....                               | p33 |
| Figure S9.....                               | p34 |
| Figure S10.....                              | p35 |
| Description of Supplementary Data Files..... | p36 |

**Table S1.** Data sets annotated with bioactivity end point “inhibition” from ChEMBL: Reference to the original manuscript, PMID, compound concentration used in the experiment, number of unique compounds (after standardization procedure) and recommended activity thresholds are given.

| Reference                                                                                                                                                                                                                                                                                                                      | PMID     | c [uM]        | Cmpd. number | Recommended threshold |
|--------------------------------------------------------------------------------------------------------------------------------------------------------------------------------------------------------------------------------------------------------------------------------------------------------------------------------|----------|---------------|--------------|-----------------------|
| Marada, V.V.; Flörl, S.; Kühne, A.; Burckhardt, G.; Hagos, Y. Interaction of human organic anion transporter polypeptides 1B1 and 1B3 with antineoplastic compounds. <i>Eur. J. Med. Chem.</i> <b>2015</b> , <i>92</i> , 723-731.                                                                                              | 25618019 | 100           | 8            | > 60% is active       |
| De Bruyn, T.; van Westen, G.J.P., IJzerman, A.P., Stieger, B., de Witte, P., Augustijns, P.F., Annaert, P.P. Structure-Based Identification of OATP1B1/3 Inhibitors. <i>Mol. Pharmacol.</i> <b>2013</b> , <i>83</i> (6), 1257-1267.                                                                                            | 23571415 | 10            | 1367         | > 50% is active       |
| Karlgren, M.; Vildhede, A.; Norinder, U.; Wisniewski, J. R.; Kimoto, E.; Lai, Y.; Haglund, U.; Artursson, P. Classification of Inhibitors of Hepatic Organic Anion Transporting Polypeptides (OATPs): Influence of Protein Expression on Drug–Drug Interactions. <i>J. Med. Chem.</i> <b>2012</b> , <i>55</i> (10), 4740–4763. | 22541068 | 20            | 221          | > 50% is active       |
| Kobayashi, D.; Nozawa, T.; Imai, K.; Nezu, J., Tsuji, A.; Tamai, I. Involvement of human organic anion transporting polypeptide OATP-B (SLC21A9) in pH-dependent transport across intestinal apical membrane. <i>J. Pharmacol. Exp. Ther.</i> <b>2003</b> , <i>306</i> (2), 703-708.                                           | 12724351 | 1000<br>10000 | 2            | REMOVED               |

|                                                                                                                                                                                                                                                   |                 |            |          |                                                                                                                                                                                                                                                                                           |
|---------------------------------------------------------------------------------------------------------------------------------------------------------------------------------------------------------------------------------------------------|-----------------|------------|----------|-------------------------------------------------------------------------------------------------------------------------------------------------------------------------------------------------------------------------------------------------------------------------------------------|
| <p>St-Pierre, M. V.; Hagenbuch, B.; Ugele, B.; Meier, P. J.; Stallmach, T. Characterization of an organic anion-transporting polypeptide (OATP-B) in human placenta. <i>J. Clin. Endocrinol. Metab.</i> <b>2002</b>, 87(4), 1856-1863</p>         | <p>11932330</p> | <p>100</p> | <p>1</p> | <p>&gt; 60% is active<br/><br/>(based on the threshold from Marada, V.V.; Flörl, S.; Kühne, A.; Burckhardt, G.; Hagos, Y. Interaction of human organic anion transporter polypeptides 1B1 and 1B3 with antineoplastic compounds. <i>Eur. J. Med. Chem.</i> <b>2015</b>, 92, 723-731.)</p> |
| <p>Ishiguro, N.; Shimizu, H.; Kishimoto, W.; Ebner, T.; Schaefer, O. Evaluation and prediction of potential drug-drug interactions of linagliptin using in vitro cell culture methods. <i>Drug Metab. Dispos.</i> <b>2013</b>, 41(1), 149-158</p> | <p>23073734</p> | <p>100</p> | <p>1</p> | <p>&gt; 60% is active<br/><br/>(based on the threshold from Marada, V.V.; Flörl, S.; Kühne, A.; Burckhardt, G.; Hagos, Y. Interaction of human organic anion transporter polypeptides 1B1 and 1B3 with antineoplastic compounds. <i>Eur. J. Med. Chem.</i> <b>2015</b>, 92, 723-731.)</p> |

|                                                                                                                                                                                                                                                                                                                                         |                 |                   |          |                                                                                                                                                                                                                                                                                                                                                                                                                                                                                                                                                                                                                 |
|-----------------------------------------------------------------------------------------------------------------------------------------------------------------------------------------------------------------------------------------------------------------------------------------------------------------------------------------|-----------------|-------------------|----------|-----------------------------------------------------------------------------------------------------------------------------------------------------------------------------------------------------------------------------------------------------------------------------------------------------------------------------------------------------------------------------------------------------------------------------------------------------------------------------------------------------------------------------------------------------------------------------------------------------------------|
| <p>Sandhu, P.; Lee, W.; Xu, X.; Leake, B. F.; Yamazaki, M.; Stone, J. A.; Lin, J. H.; Pearson, P. G.; Kim, R. B. Hepatic uptake of the novel antifungal agent caspofungin. <i>Drug Metab. Dispos.</i> <b>2005</b>, 33(1), 676</p>                                                                                                       | <p>15716364</p> | <p>100<br/>10</p> | <p>2</p> | <p>&gt; 60% is active (for c=100 uM)</p> <p>(based on the threshold from Marada, V.V.; Flörl, S.; Kühne, A.; Burckhardt, G.; Hagos, Y. Interaction of human organic anion transporter polypeptides 1B1 and 1B3 with antineoplastic compounds. <i>Eur. J. Med. Chem.</i> <b>2015</b>, 92, 723-731.)</p> <p>&gt; 50% is active (for c=10 uM)</p> <p>(based on the threshold from De Bruyn, T.; van Westen, G.J.P., IJzerman, A.P., Stieger, B., de Witte, P., Augustijns, P.F., Annaert, P.P. Structure-Based Identification of OATP1B1/3 Inhibitors. <i>Mol. Pharmacol.</i> <b>2013</b>, 83 (6), 1257-1267.)</p> |
| <p>Nozawa, T.; Minami, H.; Sugiura, S.; Tsuji, A.; Tamai, I. Role of organic anion transporter OATP1B1 (OATP-C) in hepatic uptake of irinotecan and its active metabolite, 7-ethyl-10-hydroxycamptothecin: in vitro evidence and effect of single nucleotide polymorphisms. <i>Drug Metab. Dispos.</i>, <b>2005</b>, 33(3), 434-439</p> | <p>15608127</p> | <p>10</p>         | <p>2</p> | <p>&gt; 50% is active</p> <p>(based on the threshold from De Bruyn, T.; van Westen, G.J.P., IJzerman, A.P., Stieger, B., de Witte, P., Augustijns, P.F., Annaert, P.P. Structure-Based Identification of OATP1B1/3 Inhibitors. <i>Mol. Pharmacol.</i> <b>2013</b>, 83 (6), 1257-1267.)</p>                                                                                                                                                                                                                                                                                                                      |

|                                                                                                                                                                                                                                                                                                                    |          |              |   |                                                                                                                                                                                                                                                                                   |
|--------------------------------------------------------------------------------------------------------------------------------------------------------------------------------------------------------------------------------------------------------------------------------------------------------------------|----------|--------------|---|-----------------------------------------------------------------------------------------------------------------------------------------------------------------------------------------------------------------------------------------------------------------------------------|
| Nozawa, T.; Sugiura, S.; Nakajima, M.; Goto, A.; Yokoi, T.; Nezu, J. I.; Tsuji, A.; Tamai, I. Involvement of organic anion transporting polypeptides in the transport of troglitazone sulfate: implications for understanding troglitazone hepatotoxicity. <i>Drug Metab. Dispos.</i> <b>2004</b> , 32(3), 291-294 | 14977862 | 1<br>10      | 6 | > 50% is active<br><br>(based on the threshold from De Bruyn, T.; van Westen, G.J.P., IJzerman, A.P., Stieger, B., de Witte, P., Augustijns, P.F., Annaert, P.P. Structure-Based Identification of OATP1B1/3 Inhibitors. <i>Mol. Pharmacol.</i> <b>2013</b> , 83 (6), 1257-1267.) |
| Nozawa, T.; Tamai, I.; Sai, Y.; Nezu, J. I.; Tsuji, A. Contribution of organic anion transporting polypeptide OATP-C to hepatic elimination of the opioid pentapeptide analogue [d-Ala 2, d-Leu5]-enkephalin. <i>J. Pharm. Pharmacol.</i> <b>2003</b> , 55(7), 1013-1020                                           | 12906759 | 1000<br>5000 | 3 | REMOVED                                                                                                                                                                                                                                                                           |
| König, J.; Cui, Y.; Nies, A. T.; Keppler, D. A novel human organic anion transporting polypeptide localized to the basolateral hepatocyte membrane. <i>Am. J. Physiol. Gastrointest. Liver Physiol.</i> <b>2000</b> , 278(1): G156-G164                                                                            | 10644574 | 50<br>1000   | 2 | REMOVED                                                                                                                                                                                                                                                                           |
| Satoh, H.; Yamashita, F.; Tsujimoto, M.; Murakami, H.; Koyabu, N.; Ohtani, H.; Sawada, Y. Citrus juices inhibit the function of human organic anion transporting polypeptide OATP-B. Drug metabolism and disposition. <i>Drug Metab. Dispos.</i> <b>2005</b> , 33(1): 518                                          | 15640378 | 1<br>10      | 4 | > 50% is active<br><br>(based on the threshold from De Bruyn, T.; van Westen, G.J.P., IJzerman, A.P., Stieger, B., de Witte, P., Augustijns, P.F., Annaert, P.P. Structure-Based Identification of OATP1B1/3 Inhibitors. <i>Mol. Pharmacol.</i> <b>2013</b> , 83 (6), 1257-1267.) |

**Table S2.** Data sets annotated with bioactivity end point “inhibition” from Metrabase<sup>1</sup>: Reference to the original manuscript, PMID, compound concentration used in the experiment, number of unique compounds (after standardization procedure) and recommended activity thresholds are given.

| Reference                                                                                                                                                                                                                                                                                                                      | PMID     | c [uM]        | Cmpd. number | Recommended threshold |
|--------------------------------------------------------------------------------------------------------------------------------------------------------------------------------------------------------------------------------------------------------------------------------------------------------------------------------|----------|---------------|--------------|-----------------------|
| Karlgren, M.; Vildhede, A.; Norinder, U.; Wisniewski, J. R.; Kimoto, E.; Lai, Y.; Haglund, U.; Artursson, P. Classification of Inhibitors of Hepatic Organic Anion Transporting Polypeptides (OATPs): Influence of Protein Expression on Drug–Drug Interactions. <i>J. Med. Chem.</i> <b>2012</b> , <i>55</i> (10), 4740–4763. | 22541068 | 20            | 5            | > 50% is active       |
| Sai, Y.; Kaneko, Y.; Ito, S.; Mitsuoka, K.; Kato, Y.; Tamai, I.; Artursson, P.; Tsuji, A. Predominant contribution of organic anion transporting polypeptide OATP-B (OATP2B1) to apical uptake of estrone-3-sulfate by human intestinal Caco-2 cells. <i>Drug Metab Dispos.</i> <b>2006</b> , <i>34</i> (8):1423-31            | 16714376 | 1000<br>10000 | 2            | REMOVED               |

<sup>1</sup> This table does not include ~150 data sets from Metrabase where there were additional sources available (e.g. from ChEMBL).

|                                                                                                                                                                                                                                                                                                                                                                |          |                |   |                                                                                                                                                                                                                                                                                |
|----------------------------------------------------------------------------------------------------------------------------------------------------------------------------------------------------------------------------------------------------------------------------------------------------------------------------------------------------------------|----------|----------------|---|--------------------------------------------------------------------------------------------------------------------------------------------------------------------------------------------------------------------------------------------------------------------------------|
| Fuchikami, H.; Satoh, H.; Tsujimoto, M.; Ohdo, S.; Ohtani, H.; Sawada, Y. Effects of Herbal Extracts on the Function of Human Organic Anion Transporting Polypeptide, OATP-B. <i>Drug Metab Dispos.</i> <b>2006</b> , 34(4):577-82                                                                                                                             | 16415120 | 1<br>10<br>100 | 4 | > 60% is active<br><br>(based on the threshold from Marada, V.V.; Flörl, S.; Kühne, A.; Burckhardt, G.; Hagos, Y. Interaction of human organic anion transporter polypeptides 1B1 and 1B3 with antineoplastic compounds. <i>Eur. J. Med. Chem.</i> <b>2015</b> , 92, 723-731.) |
| Kis, O.; Zastre, J. A.; Ramaswamy, M.; Bendayan, R. pH dependence of organic anion-transporting polypeptide 2B1 in Caco-2 cells: potential role in antiretroviral drug oral bioavailability and drug–drug interactions. <i>J Pharmacol Exp Ther.</i> <b>2010</b> , 334(3):1009-22                                                                              | 20507927 | 100            | 4 | > 60% is active<br><br>(based on the threshold from Marada, V.V.; Flörl, S.; Kühne, A.; Burckhardt, G.; Hagos, Y. Interaction of human organic anion transporter polypeptides 1B1 and 1B3 with antineoplastic compounds. <i>Eur. J. Med. Chem.</i> <b>2015</b> , 92, 723-731.) |
| Grube, M.; Köck, K.; Oswald, S.; Draber, K.; Meissner, K.; Eckel, L.; Böhm, M.; Felix, S. B.; Vogelgesang, S.; Jedlitschky, G.; Siegmund, W; Warzok, R.; Kroemer, H. K. Organic anion transporting polypeptide 2B1 is a high-affinity transporter for atorvastatin and is expressed in the human heart. <i>Clin Pharmacol Ther.</i> <b>2006</b> , 80(6):607-20 | 17178262 | 10             | 1 | > 50% is active                                                                                                                                                                                                                                                                |



|                                                                                                                                                                                                                                               |          |     |   |                                                                                                                                                                                                                                                                                            |
|-----------------------------------------------------------------------------------------------------------------------------------------------------------------------------------------------------------------------------------------------|----------|-----|---|--------------------------------------------------------------------------------------------------------------------------------------------------------------------------------------------------------------------------------------------------------------------------------------------|
| <p>Grube, M.; Kock, K.; Karner, S.; Reuther, S.; Ritter, C. A.; Jedlitschky, G.; Kroemer, H. K. Modification of OATP2B1 mediated transport by steroid hormones. <i>Molecular pharmacology. Mol Pharmacol.</i> <b>2006</b>, 70(5):1735-41.</p> | 16908597 | 10  | 2 | <p>&gt; 50% is active</p> <p>(based on the threshold from De Bruyn, T.; van Westen, G.J.P., IJzerman, A.P., Stieger, B., de Witte, P., Augustijns, P.F., Annaert, P.P. Structure-Based Identification of OATP1B1/3 Inhibitors. <i>Mol. Pharmacol.</i> <b>2013</b>, 83 (6), 1257-1267.)</p> |
| <p>Reyes, M.; Benet, L. Z. Effects of uremic toxins on transport and metabolism of different biopharmaceutics drug disposition classification system xenobiotics. <i>J Pharm Sci.</i> <b>2011</b>, 100(9):3831-42</p>                         | 21618544 | 400 | 2 | REMOVED                                                                                                                                                                                                                                                                                    |

**Table S3.** Removed substrates from OATP1B1 substrate data set with conflicting annotations (median value equals to 0.5). Compound names and InChIKeys are provided.

| Name                                                                                                                  | InChIKey                    |
|-----------------------------------------------------------------------------------------------------------------------|-----------------------------|
| Methylaminopterin                                                                                                     | FBOZXECLQNJBKD-UHFFFAOYSA-N |
| No name                                                                                                               | HMBKEXWSKGGBBT-WCHIAOBISA-N |
| 3,7-Dihydroxycholan-24-oic acid                                                                                       | RUDATBOHQWOJDD-UHFFFAOYSA-N |
| (8S,9S,13S,14S)-17-ethynyl-17-hydroxy-13-methyl-3-sulfoxy-7,8,9,11,12,14,15,16-octahydro-6H-cyclopenta[a]phenanthrene | WLGIWVFFGMPRLM-UHFFFAOYSA-N |

**Table S4.** Removed substrates from OATP1B3 substrate data set with conflicting annotations (median value equals to 0.5). Compound names and InChIKeys are provided.

| Name           | InChIKey                    |
|----------------|-----------------------------|
| Caloxetic acid | AQOXEJNYXXLRQQ-UHFFFAOYSA-N |

**Table S5.** Removed substrates from OATP2B1 substrate data set with conflicting annotations (median value equals to 0.5). Compound names and InChIKeys are provided.

| Name                                                                                                      | InChIKey                        |
|-----------------------------------------------------------------------------------------------------------|---------------------------------|
| Breviscapine                                                                                              | DJSISFGPUUYILV-<br>UHFFFAOYSA-N |
| Ethyldiisopropylamine                                                                                     | FUWQJNSUHNKFNP-<br>UHFFFAOYSA-N |
| Bosentan                                                                                                  | GJPICJJJRGTNOD-<br>UHFFFAOYSA-N |
| 6- {[5,7-dihydroxy-2-(4-hydroxyphenyl)-4-oxo-4H-chromen-6-yl]oxy}-3,4,5-trihydroxyoxane-2-carboxylic acid | HBLWMMBFOKSEKW-<br>UHFFFAOYSA-N |
| Talinolol                                                                                                 | MXFWWQICDIZSOA-<br>UHFFFAOYSA-N |
| No name                                                                                                   | QQCSUWGQBREWRO-<br>CYVLTUHYSAN  |
| 2,2',4,4'-Tetrabromodiphenyl ether                                                                        | XYBSIYMGXVUVGY-<br>UHFFFAOYSA-N |

**Table S6.** Removed inhibitors from OATP1B1 inhibitor data set with conflicting annotations (median value equals to 0.5). Compound names and InChIKeys are provided.

| Name                                                                                                                         | InChIKey                     |
|------------------------------------------------------------------------------------------------------------------------------|------------------------------|
| Lanosteryl acetate                                                                                                           | BQPPJGMMIYJVBR-UHFFFAOYSA-N  |
| Capsazepine                                                                                                                  | DRCMAZOSEIMCHM-UHFFFAOYSA-N  |
| Zopiclone                                                                                                                    | GBBSUAFBMRNDJC-UHFFFAOYSA-N  |
| 3-Episarsasapogenin                                                                                                          | GMBQZIIUCVWOCU-UHFFFAOYSA-N  |
| Quinine                                                                                                                      | LOUPRKONTZGTKE-UHFFFAOYSA-N  |
| Spirolactone                                                                                                                 | LXMSZDCAJNLERA-UHFFFAOYSA-N  |
| Estradiol-3-sulfate                                                                                                          | QZIGLSSUDXBTLJ-UHFFFAOYSA-N  |
| Taurocholic acid                                                                                                             | WBWWGRHZICKQGZ-UHFFFAOYSA-N  |
| 10-acetyloxy-1,2,6a,6b,9,9,12a-heptamethyl-13-oxo-1,2,3,4,5,6,6a,7,8,8a,10,11,12,14b-tetradecahydronicene-4a-carboxylic acid | XDHCWTUZCOFKRH-UHFFFAOYSA-N  |
| Eltrombopag                                                                                                                  | XDXWLKQMMKQXPV-QYQHSDDTDSA-N |
| Cephalothin                                                                                                                  | XIURVHNZVLADCM-UHFFFAOYSA-N  |

**Table S7.** Removed inhibitors from OATP1B3 inhibitor data set with conflicting annotations (median value equals to 0.5). Compound names and InChIKeys are provided.

| Name                                                                                                                                        | InChIKey                    |
|---------------------------------------------------------------------------------------------------------------------------------------------|-----------------------------|
| Lanosteryl acetate                                                                                                                          | BQPPJGMMIYJVBR-UHFFFAOYSA-N |
| Capsazepine                                                                                                                                 | DRCMAZOSEIMCHM-UHFFFAOYSA-N |
| Zopiclone                                                                                                                                   | GBBSUAFBMRNDJC-UHFFFAOYSA-N |
| 17beta-estradiol 17beta-D-glucuronide                                                                                                       | MTKNDAQYHASLID-UHFFFAOYSA-N |
| Vincristine                                                                                                                                 | OGWKCGZFUXNPDA-UHFFFAOYSA-N |
| Hoechst 33342                                                                                                                               | PRDFBSVERLRMY-UHFFFAOYSA-N  |
| (1-{{(1-{{3-[(E)-2-(7-chloroquinolin-2-yl)ethenyl]phenyl}}-3-[2-(2-hydroxypropan-2-yl)phenyl]propyl)sulfanyl)methyl}cyclopropyl)acetic acid | UCHDWCPVSPXUMX-XNTDXEJSSA-N |
| No name                                                                                                                                     | UWNQSONNONTGTF-UHFFFAOYSA-N |
| Nefazodone                                                                                                                                  | VRBKIVRKKCLPHA-UHFFFAOYSA-N |
| No name                                                                                                                                     | WTDQOIVETOYZMZ-UHFFFAOYSA-N |
| Antamanide                                                                                                                                  | WTINJQXJTHUFRF-UHFFFAOYSA-N |
| 10-acetyloxy-1,2,6a,6b,9,9,12a-heptamethyl-13-oxo-1,2,3,4,5,6,6a,7,8,8a,10,11,12,14b-tetradecahydronicene-4a-carboxylic acid                | XDHCWTUZCOFKRH-UHFFFAOYSA-N |
| Levothyroxine                                                                                                                               | XUIIKFGFIJCVMT-UHFFFAOYSA-N |

**Table S8.** Removed inhibitors from OATP1B3 inhibitor data set with conflicting annotations (median value equals to 0.5). Compound names and InChIKeys are provided.

| Name                           | InChIKey                     |
|--------------------------------|------------------------------|
| Dehydroepiandrosterone sulfate | CZWCKYRVOZZJNM-UHFFFAOYSA-N  |
| Estrone-d4                     | DNXHEGUUPJUMQT-UHFFFAOYSA-N  |
| Repaglinide                    | FAEKWTJYAYMJKF-UHFFFAOYSA-N  |
| 6',7'-dihydroxy Bergamottin    | IXZUPBUEKFXTSD-MDWZMJQESA-N  |
| Epicatechin-3-gallate          | LSHVYAFMTMFKBA-UHFFFAOYSA-N  |
| Nobiletin                      | MRIAQLRQZPPODS-UHFFFAOYSA-N  |
| Nelfinavir                     | QAGYKUNXZHKKMR-UHFFFAOYSA-N  |
| Quercetin                      | REFJWTPEDEVJJIY-UHFFFAOYSA-N |
| Tangeretin                     | ULSUXBXHSYSGDT-UHFFFAOYSA-N  |
| Efavirenz                      | XPOQHMRABVBWPR-UHFFFAOYSA-N  |
| Rosiglitazone                  | YASAKCUCGLMORW-UHFFFAOYSA-N  |

**Table S9.** Percentage of conflicting compound activities based on the comparison of data from ChEMBL and Metrabase.

| Activity         | OATP1B1 | OATP1B3 | OATP2B1 |
|------------------|---------|---------|---------|
| (non-)substrates | 40%     | 36%     | 60%     |
| (non-)inhibitors | 64%     | 74%     | 10%     |

**Table S10.** “Dense dataset” for hepatic OATP substrates.

| Class | Nr. | Description                    |
|-------|-----|--------------------------------|
| 0     | 6   | General substrates             |
| 1     | 0   | 1B1+1B3 overlapping substrates |
| 2     | 2   | 1B1+2B1 overlapping substrates |
| 3     | 0   | 1B3+2B1 overlapping substrates |
| 4     | 0   | Selective 1B1 substrates       |
| 5     | 2   | Selective 1B3 substrates       |
| 6     | 2   | Selective 2B1 substrates       |
| 7     | 1   | General non-substrates         |

**Table S11.** “Dense dataset” for hepatic OATP inhibitors.

| Class | Nr. | Description                    |
|-------|-----|--------------------------------|
| 0     | 26  | General inhibitors             |
| 1     | 14  | 1B1+1B3 overlapping inhibitors |
| 2     | 10  | 1B1+2B1 overlapping inhibitors |
| 3     | 1   | 1B3+2B1 overlapping inhibitors |
| 4     | 12  | Selective 1B1 inhibitors       |
| 5     | 2   | Selective 1B3 inhibitors       |
| 6     | 10  | Selective 2B1 inhibitors       |
| 7     | 88  | General non- inhibitors        |



**Table S12.** Ten detected compounds with hexahydronaphthalene-associated scaffold (highlighted in red) with pharmacological profiles included: “1”....active; “0”....inactive; “?” ....missing annotation.

| Name             | Structure                                                                           | OATP1B1 | OATP1B3 | OATP2B1 |
|------------------|-------------------------------------------------------------------------------------|---------|---------|---------|
| Mevinolin        | 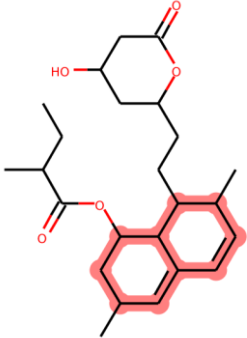   | 1       | 0       | 0       |
| Lovastatin Acid  |   | 1       | ?       | ?       |
| Simvastatin Acid |  | 1       | 0       | ?       |

|                              |                                                                                                                                                                                                                                                                                                                                                                                                                                                                                                       |          |          |          |
|------------------------------|-------------------------------------------------------------------------------------------------------------------------------------------------------------------------------------------------------------------------------------------------------------------------------------------------------------------------------------------------------------------------------------------------------------------------------------------------------------------------------------------------------|----------|----------|----------|
| <p>Pravastatin</p>           | 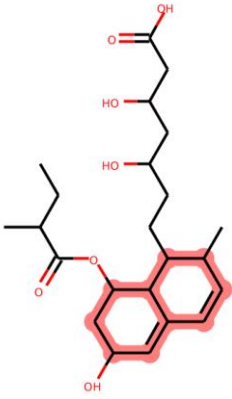 <p>The structure shows a statin core consisting of a naphthalene ring system with a hydroxyl group at the 3-position and a decalin ring system at the 4-position. The decalin ring has a hydroxyl group at the 1-position and a side chain at the 2-position. The side chain is a 3,5-dihydroxyhexanoic acid derivative, with a hydroxyl group at the 3-position and a carboxylic acid group at the 6-position.</p> | <p>1</p> | <p>0</p> | <p>0</p> |
| <p>Simvastatin</p>           |  <p>The structure shows a statin core consisting of a naphthalene ring system with a hydroxyl group at the 3-position and a decalin ring system at the 4-position. The decalin ring has a hydroxyl group at the 1-position and a side chain at the 2-position. The side chain is a 2-methylbutanoic acid derivative, with a methyl group at the 2-position and a carboxylic acid group at the 1-position.</p>       | <p>1</p> | <p>0</p> | <p>0</p> |
| <p>Cyprotenone</p>           |  <p>The structure shows a complex polycyclic system with a naphthalene ring system fused to a decalin ring system. The naphthalene ring has a chlorine atom at the 1-position and a carbonyl group at the 2-position. The decalin ring has a hydroxyl group at the 1-position and a carbonyl group at the 2-position.</p>                                                                                          | <p>1</p> | <p>?</p> | <p>?</p> |
| <p>Chlormadinone Acetate</p> |  <p>The structure shows a complex polycyclic system with a naphthalene ring system fused to a decalin ring system. The naphthalene ring has a chlorine atom at the 1-position and a carbonyl group at the 2-position. The decalin ring has a hydroxyl group at the 1-position and a carbonyl group at the 2-position. The hydroxyl group is esterified with an acetate group.</p>                                  | <p>1</p> | <p>1</p> | <p>?</p> |

|                   |                                                                                                                                                                                                                                                                                    |   |   |   |
|-------------------|------------------------------------------------------------------------------------------------------------------------------------------------------------------------------------------------------------------------------------------------------------------------------------|---|---|---|
| Megestrol Acetate | 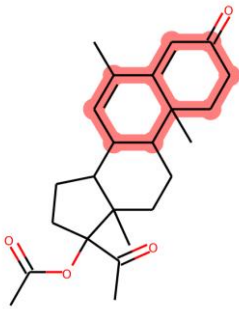 <p>The structure shows a steroid nucleus with a phenyl ring at C-3, a methyl group at C-10, and an acetate ester group at C-20. The phenyl ring and its substituents are highlighted in red.</p> | 0 | 0 | ? |
| Canrenone         |  <p>The structure shows a steroid nucleus with a phenyl ring at C-3, a methyl group at C-10, and a lactone ring at C-20. The phenyl ring and its substituents are highlighted in red.</p>         | 1 | 0 | ? |
| Abietic Acid      |  <p>The structure shows a tricyclic diterpene skeleton with a carboxylic acid group at C-18 and a methyl group at C-19. The aromatic rings and their substituents are highlighted in red.</p>   | 1 | 1 | ? |

**Table S13:** Results on Level 1 (All inhibitors + general non-inhibitors) for all calculated statistics metrics: Sensitivity, Specificity, Balanced Accuracy and MCC. The performance is given for both 10-fold cross-validation and on the external test set. With bold font are depicted those models that gave the best results.

| Model                    | Validation             | Sensitivity  | Specificity  | Balanced Accuracy | MCC          | Descriptor (% involvement in subset selection of attributes) |
|--------------------------|------------------------|--------------|--------------|-------------------|--------------|--------------------------------------------------------------|
| RandomTree               | Training set 10fold-CV | 0.893        | 0.339        | 0.616             | 0.255        | SlogP, AMW                                                   |
| RandomTree               | Test Set               | 0.805        | 0.346        | 0.576             | 0.142        |                                                              |
| CostSensitive Classifier | Training set 10fold-CV | 0.889        | 0.355        | 0.622             | 0.264        |                                                              |
| CostSensitive Classifier | Test Set               | 0.788        | 0.462        | 0.625             | 0.222        |                                                              |
| Stratified bagging       | Training set           | <b>0.760</b> | <b>0.790</b> | <b>0.775</b>      | <b>0.455</b> |                                                              |
| Stratified bagging       | Test Set               | <b>0.796</b> | <b>0.769</b> | <b>0.783</b>      | <b>0.477</b> |                                                              |

Level 1: All inhibitors + general non-inhibitors (Training set)

CostSensitive Classifier: Cost matrix [0.0, 4.0; 1.0, 0.0]

Stratified Bagging with 64 bags

**Table S14:** Results on OPATP1B1 inhibition data set for all calculated statistics metrics: Sensitivity, Specificity, Balanced Accuracy and MCC. The performance is given for both 10-fold cross-validation and on the external test set. With bold font are depicted those models that gave the best results.

| Model                    | Validation                | Sensitivity  | Specificity  | Balanced Accuracy | MCC          | Descriptor (% involvement in subset selection of attributes) |
|--------------------------|---------------------------|--------------|--------------|-------------------|--------------|--------------------------------------------------------------|
| RandomTree               | Training set<br>10fold-CV | 0.547        | 0.830        | 0.689             | 0.370        | SlogP, SMR,<br>AMW, TPSA                                     |
| RandomTree               | Test Set                  | 0.580        | 0.828        | 0.704             | 0.396        |                                                              |
| CostSensitive Classifier | Training set<br>10fold-CV | 0.539        | 0.817        | 0.678             | 0.345        |                                                              |
| CostSensitive Classifier | Test Set                  | 0.540        | 0.802        | 0.671             | 0.328        |                                                              |
| Stratified bagging       | Training set              | <b>0.703</b> | <b>0.799</b> | <b>0.751</b>      | <b>0.462</b> |                                                              |
| Stratified bagging       | Test Set                  | <b>0.730</b> | <b>0.809</b> | <b>0.769</b>      | <b>0.497</b> |                                                              |

CostSensitive Classifier: Cost matrix [0.0, 1.0; 3.0, 0.0]

Stratified Bagging with 64 bags

**Table S15:** Results on OPATP1B3 inhibition data set for all calculated statistics metrics: Sensitivity, Specificity, Balanced Accuracy and MCC. The performance is given for both 10-fold cross-validation and on the external test set. With bold font are depicted those models that gave the best results.

| Model                    | Validation             | Sensitivity  | Specificity  | Balanced Accuracy | MCC          | Descriptor (% involvement in subset selection of attributes) |
|--------------------------|------------------------|--------------|--------------|-------------------|--------------|--------------------------------------------------------------|
| RandomTree               | Training set 10fold-CV | 0.496        | 0.895        | 0.696             | 0.384        | SlogP, SMR, AMW, TPSA                                        |
| RandomTree               | Test Set               | 0.373        | 0.899        | 0.636             | 0.282        |                                                              |
| CostSensitive Classifier | Training set 10fold-CV | 0.504        | 0.891        | 0.697             | 0.383        |                                                              |
| CostSensitive Classifier | Test Set               | 0.424        | 0.892        | 0.658             | 0.316        |                                                              |
| Stratified bagging       | Training set           | <b>0.748</b> | <b>0.834</b> | <b>0.791</b>      | <b>0.486</b> |                                                              |
| Stratified bagging       | Test Set               | <b>0.746</b> | <b>0.829</b> | <b>0.787</b>      | <b>0.476</b> |                                                              |

CostSensitive Classifier: Cost matrix [0.0, 1.0; 5.0, 0.0]

Stratified Bagging with 64 bags

**Table S16:** Results on OPATP2B1 inhibition data set for all calculated statistics metrics: Sensitivity, Specificity, Balanced Accuracy and MCC. The performance is given for both 10-fold cross-validation and on the external test set. With bold font are depicted those models that gave the best results.

| Model                    | Validation             | Sensitivity  | Specificity  | Balanced Accuracy | MCC          | Descriptor (% involvement in subset selection of attributes) |
|--------------------------|------------------------|--------------|--------------|-------------------|--------------|--------------------------------------------------------------|
| RandomTree               | Training set 10fold-CV | 0.535        | 0.856        | 0.695             | 0.400        | SMR, AMW                                                     |
| RandomTree               | Test Set               | 0.526        | 0.840        | 0.683             | 0.373        |                                                              |
| CostSensitive Classifier | Training set 10fold-CV | 0.535        | 0.839        | 0.687             | 0.377        |                                                              |
| CostSensitive Classifier | Test Set               | 0.526        | 0.860        | 0.693             | 0.400        |                                                              |
| Stratified bagging       | Training set           | <b>0.698</b> | <b>0.771</b> | <b>0.734</b>      | <b>0.434</b> |                                                              |
| Stratified bagging       | Test Set               | <b>0.632</b> | <b>0.840</b> | <b>0.736</b>      | <b>0.464</b> |                                                              |

CostSensitive Classifier: Cost matrix [0.0, 1.0; 3.0, 0.0]

Stratified Bagging with 64 bags

**Table S17:** Summary statistics for molecular descriptors calculated for inhibitors of OATP1B1, OATP1B3, and OATP2B1. The median and mean values for lipophilicity (SlogP), molecular refractivity (SMR), the topological polar surface area (TPSA), average molecular weight (AMW), the number of rotatable bonds (RotB), the number of amide bonds (AmideBonds), the number of rings (NumRings), and the number of aromatic carbocycles (Aromatic Carbocycles) are given.

|                        | SlogP(median) | SlogP(mean) | SMR(median)         | SMR(mean)         | TPSA(median)      | TPSA(mean)      | AMW(median)                  | AMW(mean)                  |
|------------------------|---------------|-------------|---------------------|-------------------|-------------------|-----------------|------------------------------|----------------------------|
| OATP1B1 inhibitors     | 3.99          | 3.88        | 123.70              | 141.42            | 106.86            | 126.30          | 471.64                       | 537.04                     |
| OATP1B1 non-inhibitors | 2.24          | 2.20        | 81.58               | 86.91             | 66.76             | 81.31           | 300.27                       | 327.92                     |
| OATP1B3 inhibitors     | 4.22          | 4.21        | 132.00              | 148.31            | 113.08            | 133.75          | 504.67                       | 564.47                     |
| OATP1B3 non-inhibitors | 2.33          | 2.26        | 82.39               | 87.05             | 68.22             | 81.78           | 303.60                       | 330.61                     |
| OATP2B1 inhibitors     | 3.64          | 3.71        | 127.47              | 131.36            | 109.33            | 120.63          | 481.99                       | 503.34                     |
| OATP2B1 non-inhibitors | 2.48          | 2.22        | 95.40               | 104.36            | 84.83             | 99.87           | 358.16                       | 394.43                     |
|                        |               |             |                     |                   |                   |                 |                              |                            |
|                        | RotB(median)  | RotB(mean)  | AmideBonds (median) | AmideBonds (mean) | NumRings (median) | NumRings (mean) | AromaticCarbo-cycles(median) | AromaticCarbo-cycles(mean) |
| OATP1B1 inhibitors     | 5             | 6.56        | 0                   | 1.03              | 4                 | 4.03            | 1                            | 1.10                       |
| OATP1B1 non-inhibitors | 3             | 3.96        | 0                   | 0.34              | 3                 | 2.77            | 1                            | 0.92                       |
| OATP1B3 inhibitors     | 6             | 6.90        | 0                   | 0.80              | 4                 | 4.37            | 1                            | 1.21                       |
| OATP1B3 non-inhibitors | 3             | 3.87        | 0                   | 0.35              | 3                 | 2.79            | 1                            | 0.92                       |
| OATP2B1 inhibitors     | 7             | 7.52        | 0                   | 0.74              | 4                 | 3.74            | 2                            | 1.76                       |
| OATP2B1 non-inhibitors | 4             | 4.99        | 0                   | 0.68              | 3                 | 3.18            | 1                            | 1.20                       |



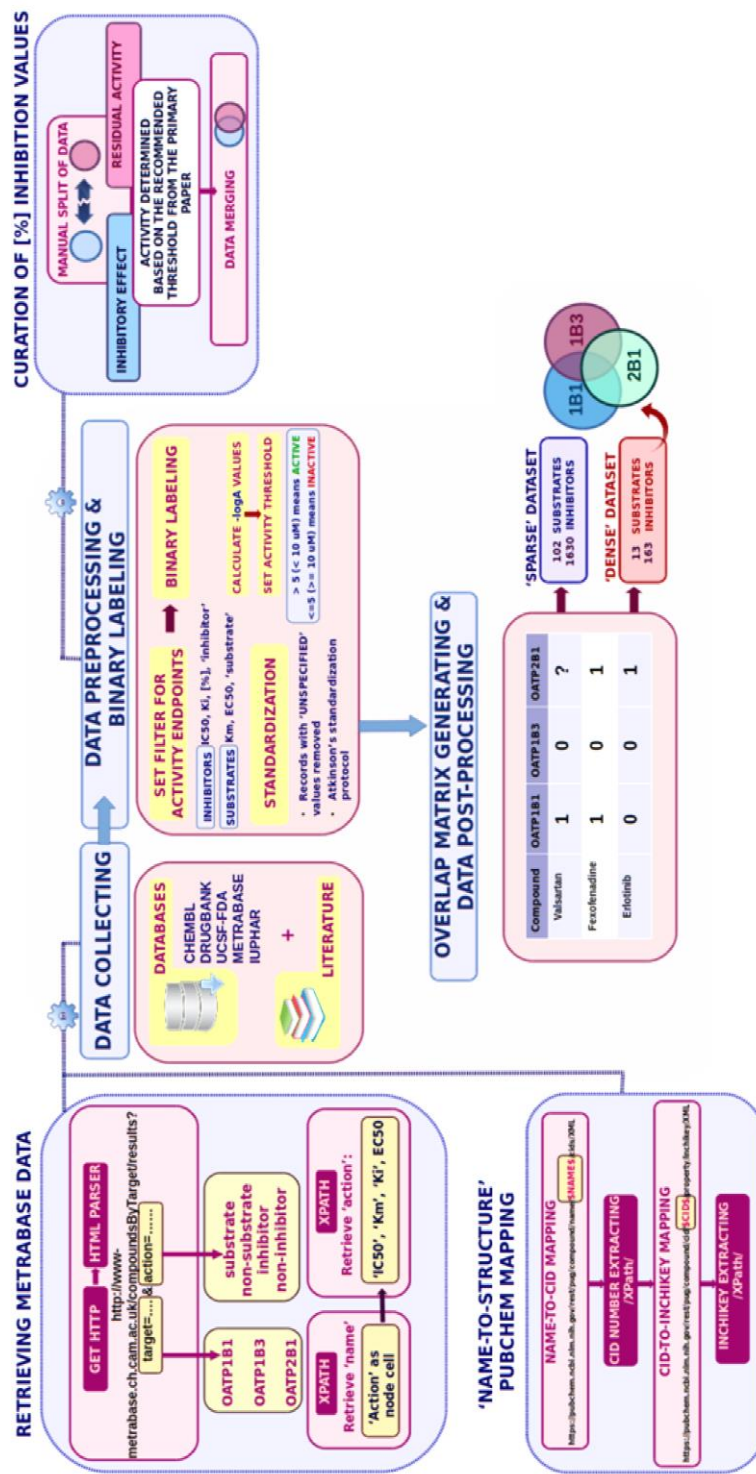

**Figure S1:** Schematic workflow for integrative data mining and curation.

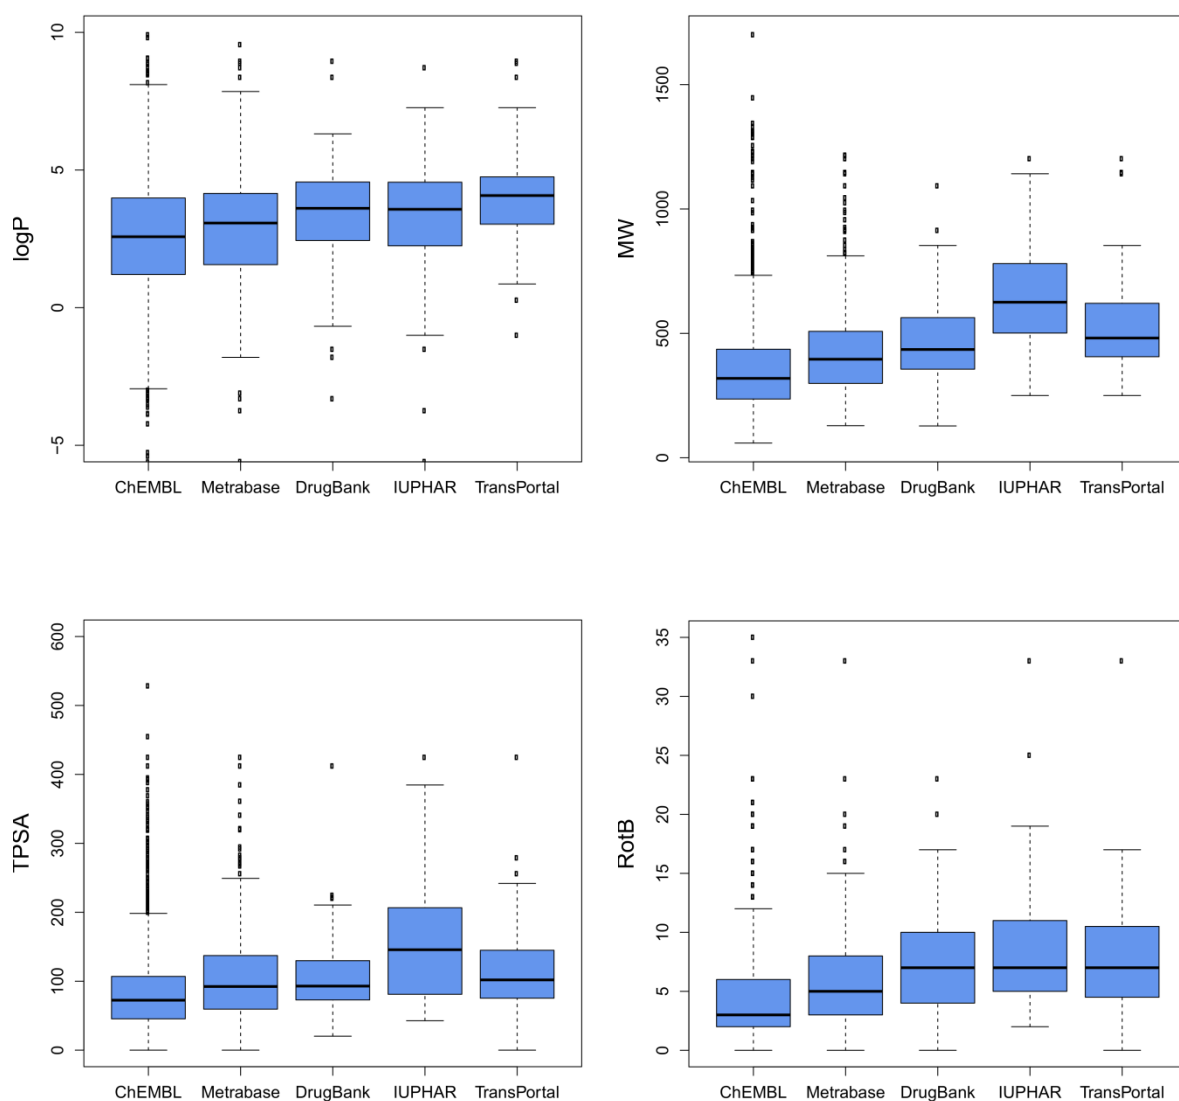

**Figure S2.** Box- and Whisker-Plots showing the distribution of molecular properties for compounds measured against human OATP1B1, OATP1B3, and OATP2B1 originating from five different data sources (ChEMBL, Metrabase, DrugBank, IUPHAR, TransPortal): partition coefficient (logP), molecular weight (MW), topological surface area (TPSA), number of rotatable bonds (RotB).

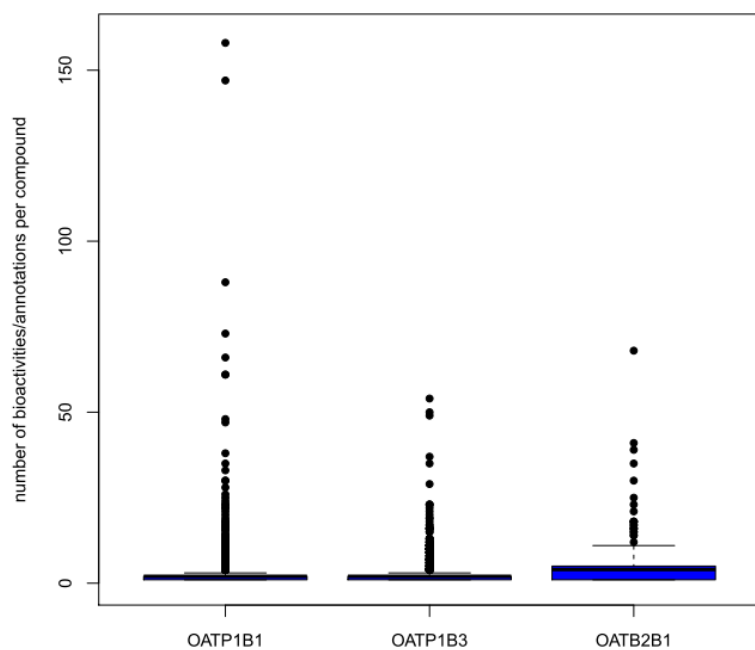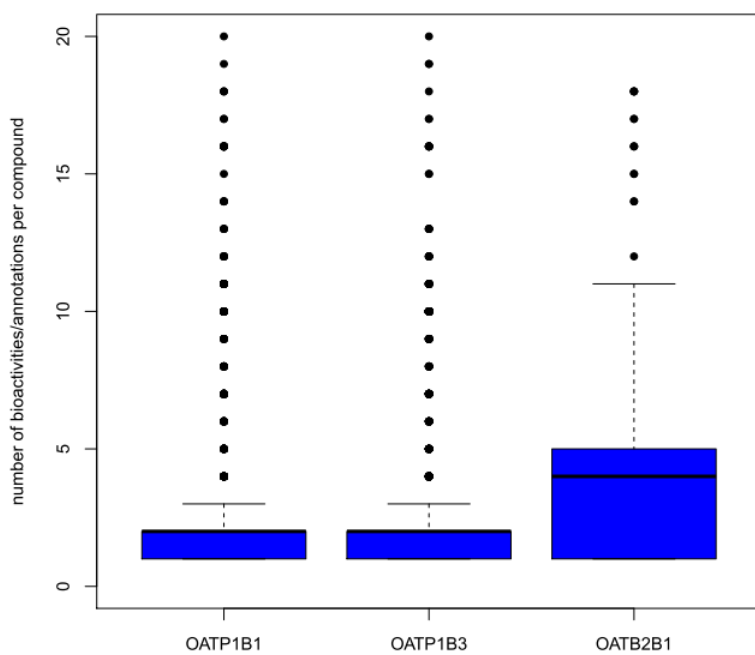

**Figure S3.** Number of bioactivities/annotations per unique compound for hepatic OATPs: upper plot....full range of bioactivity values displayed; lower plot....zoomed-in view with max. 20 bioactivities displayed.

Density plot: OATP1B1 activities

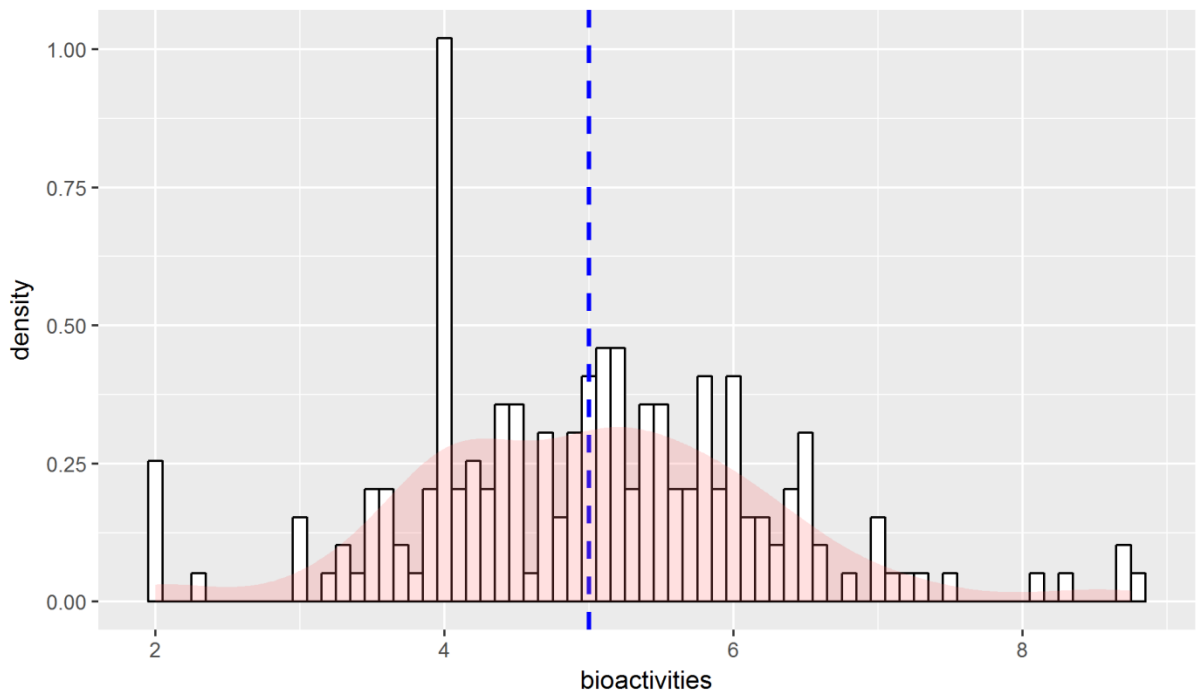

Density plot: OATP1B3 activities

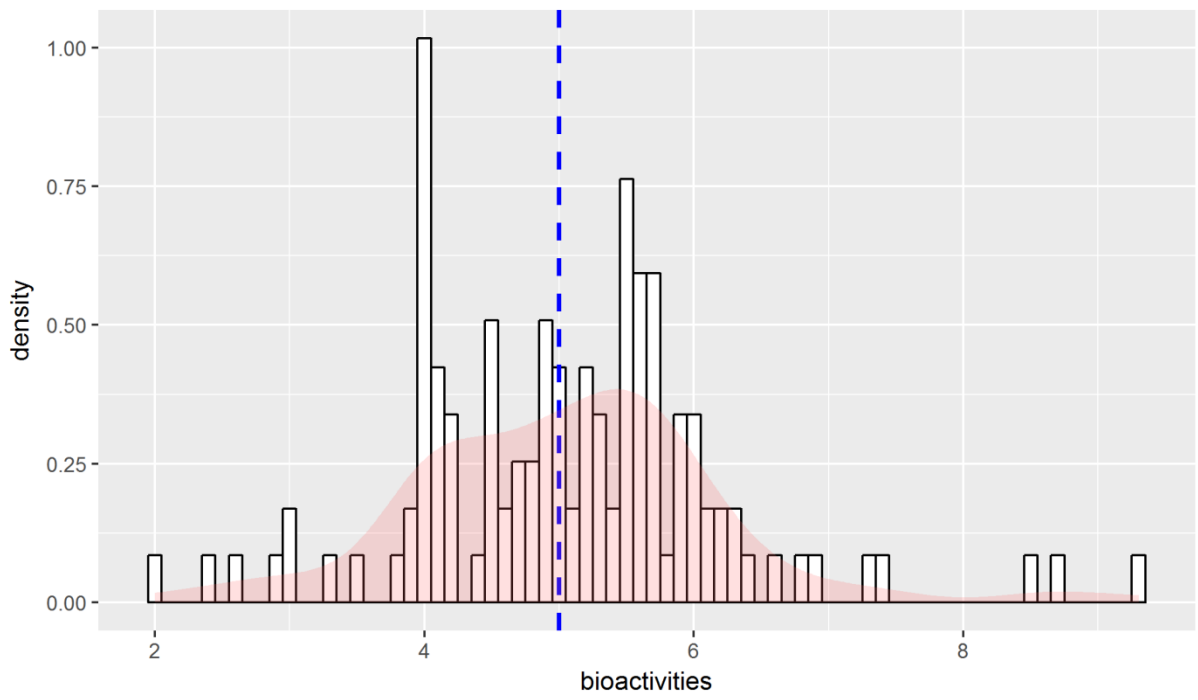

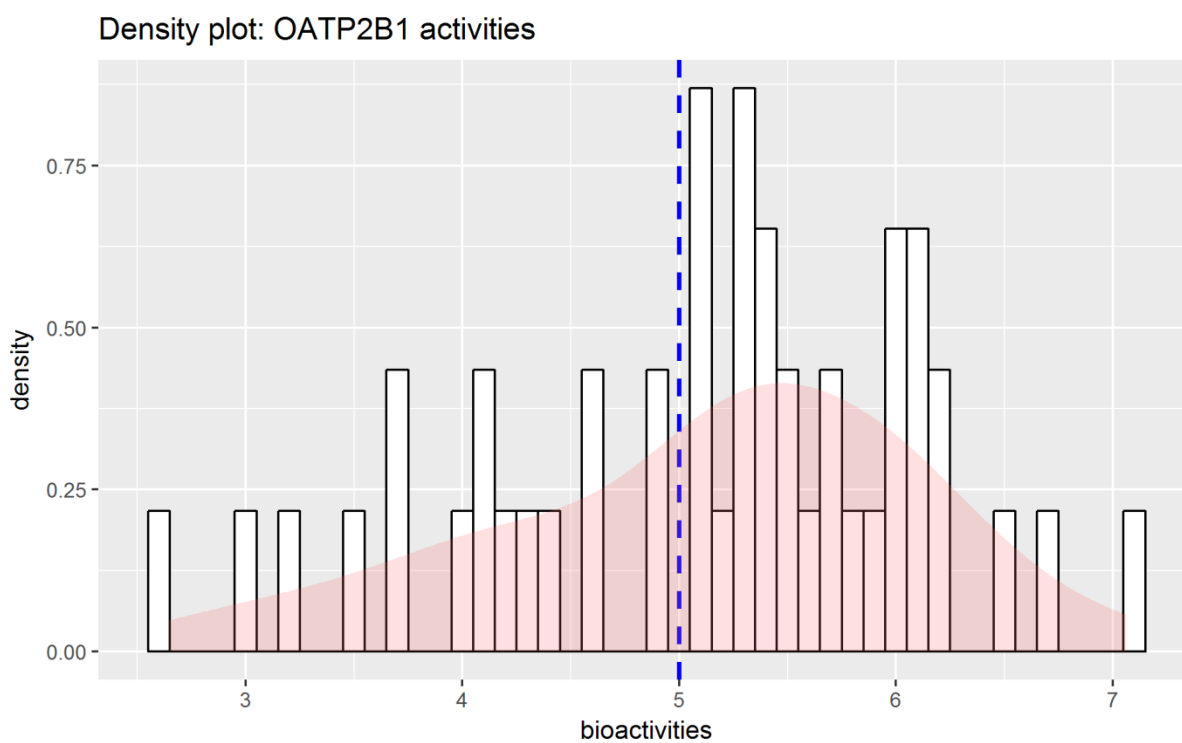

**Figure S4.** Histograms showing the distribution of median bioactivities [in negative logarithmic representation (molar)] for OATP1B1, OATP1B3, and OATP2B1. The chosen cut off for classifying compounds into actives and inactive ( $10\mu\text{M}$ ;  $-\log(\text{activity}[\text{molar}]) = 5$ ) is shown as a dashed blue line.

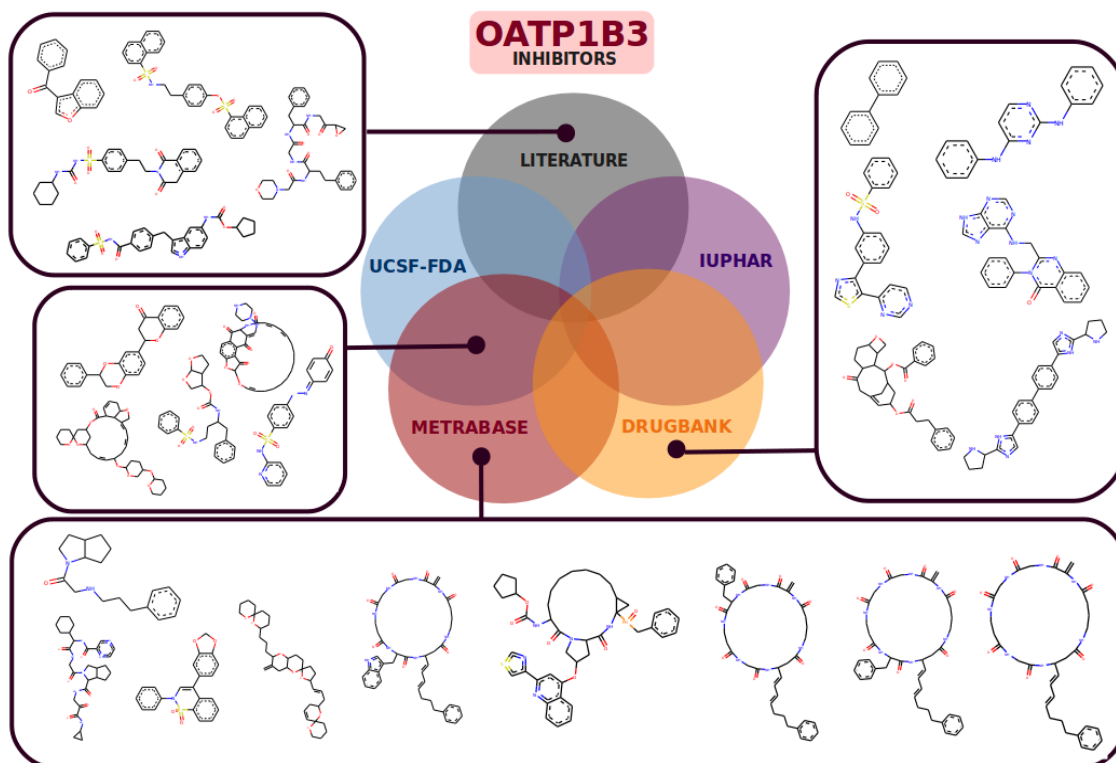

**Figure S5.** Murcko Scaffolds for OATP1B3 inhibitors retrieved from other databases than CHEMBL.

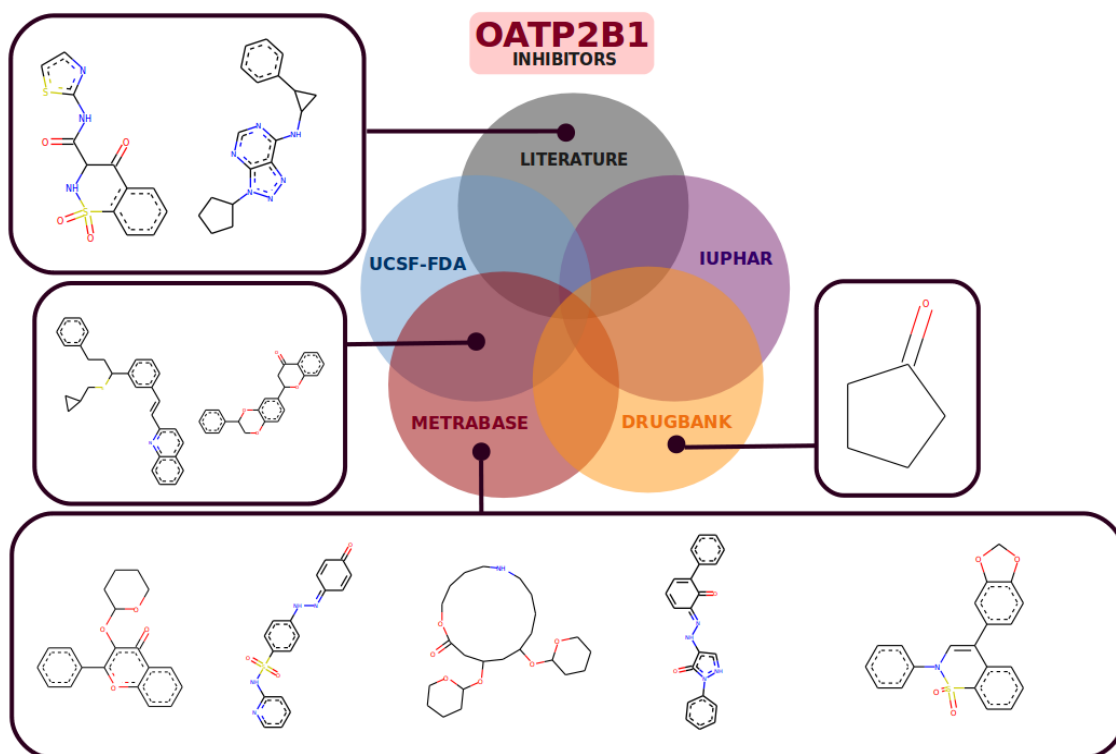

**Figure S6.** Murcko Scaffolds for OATP2B1 inhibitors retrieved from other databases than CHEMBL.

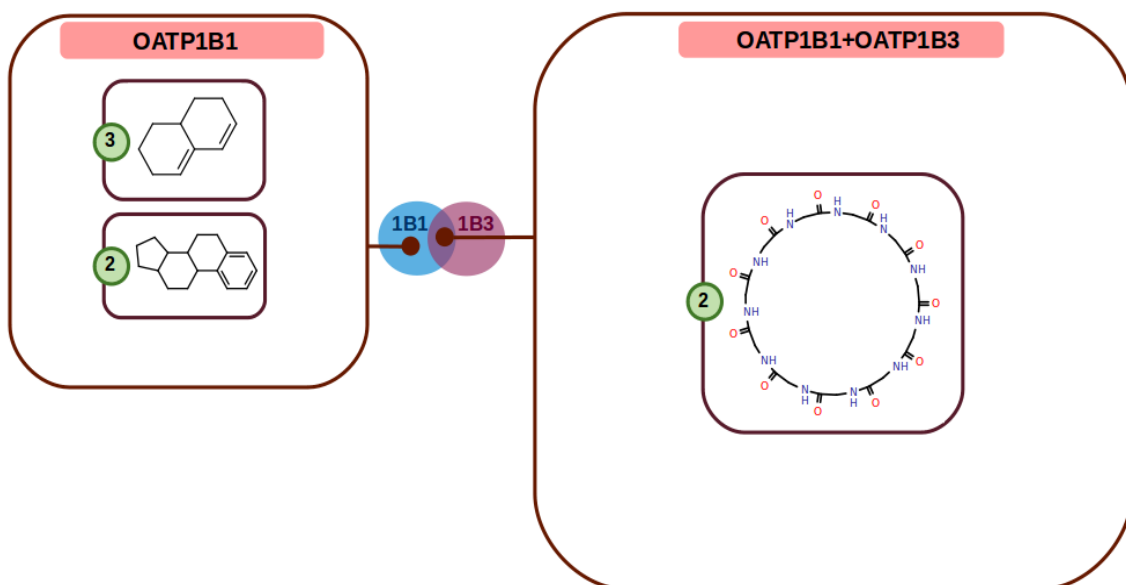

**Figure S7.** Enriched scaffolds ( $p$ -value  $< 0.05$ ) for hepatic OATP inhibitors considering the dense data set (with complete pharmacological profile). Numbers in green circles correspond to the numbers of associated compounds for a respective scaffold cluster.



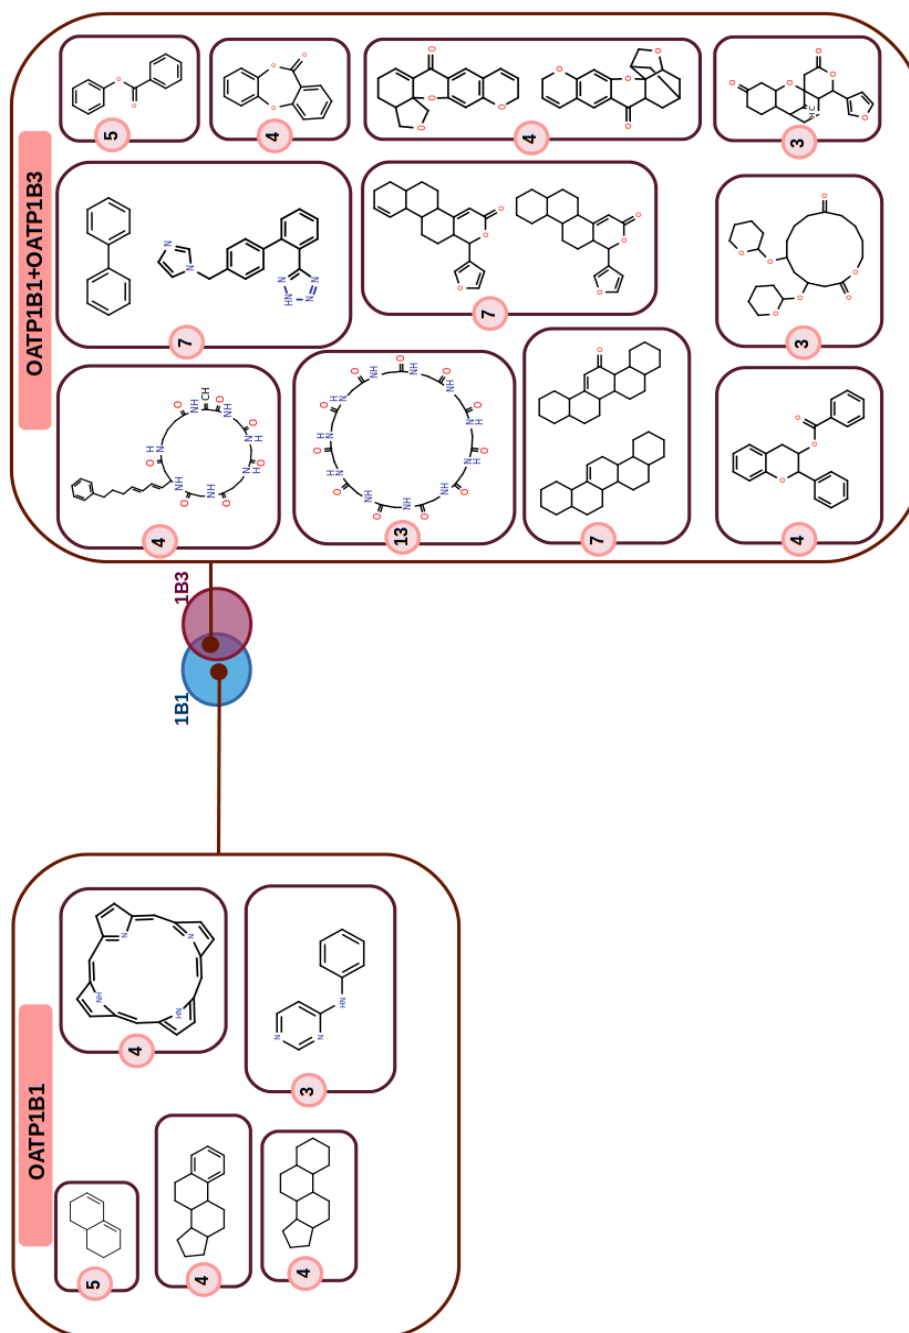

**Figure S8.** Enriched scaffolds ( $p$ -value  $< 0.05$ ) for hepatic OATP inhibitors excluding data with the activity endpoint “percentage inhibition”. Numbers in pink circles correspond to the number of associated compounds for a respective scaffold cluster.

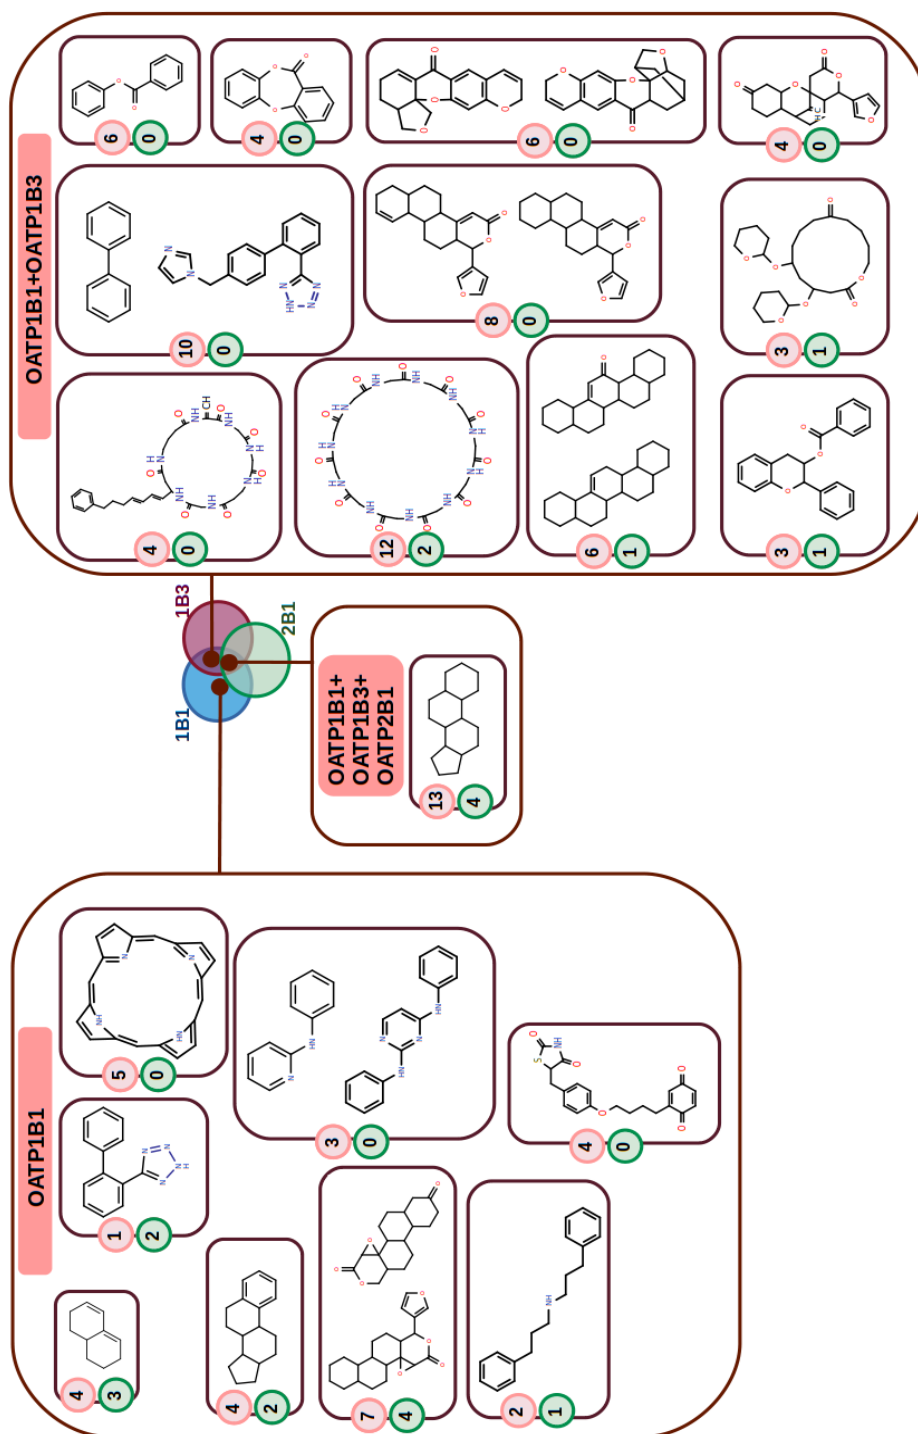

**Figure S9.** Enriched scaffolds ( $p$ -value  $< 0.1$ ) for hepatic OATP inhibitors. Numbers in pink circles correspond to the number of associated compounds with incomplete pharmacological profile, whereas numbers in green circles correspond to the number of associated compounds with complete pharmacological profile (i.e., compounds from “dense” dataset).

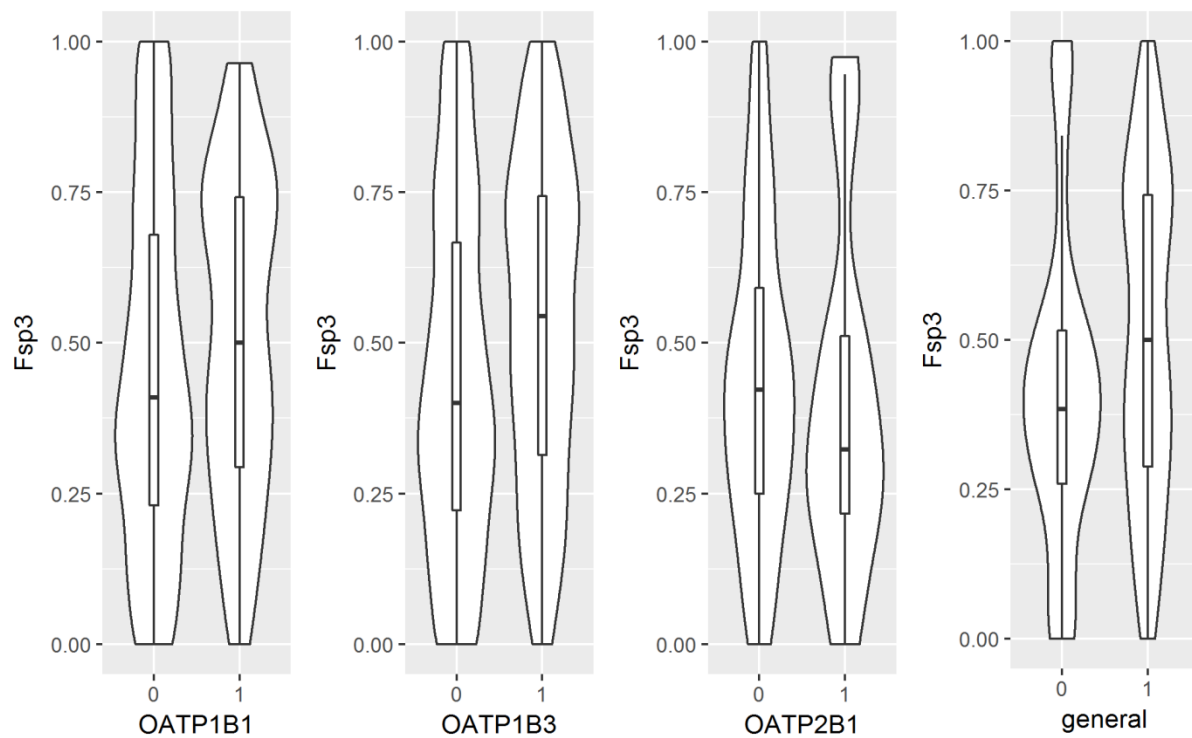

**Figure S10.** Violin- and boxplots showing the distribution of values for the feature “FractionCSP3” (Fsp3) for inhibitors vs non-inhibitors within four different data sets. Labelling on abscissae: 0....inactives; 1....actives.

### **Description of Supplementary Data Files:**

**Data File S1.** Csv-file with sparse substrate data set (102 compounds): including CHEMBL\_ID (if available), molecule name (if available), InChIKey, canonical SMILES, binary annotations (“1”....active; “0”....inactive; “?”....missing value), and median [-log[activity)] values (if available).

**Data File S2.** Csv-file with sparse inhibitor data set (1630 compounds): including CHEMBL\_ID (if available), molecule name (if available), InChIKey, canonical SMILES, binary annotations (“1”....active; “0”....inactive; “?”....missing value), and median [-log[activity)] values (if available).
